# Supplementary material
Source: PubMed Central journal article supplement (PMC5829964)

SUPPLEMENTARY DATA

**Supplementary Figure S1.** 2-year rates of heart failure hospitalization and CV death or heart failure hospitalization by score

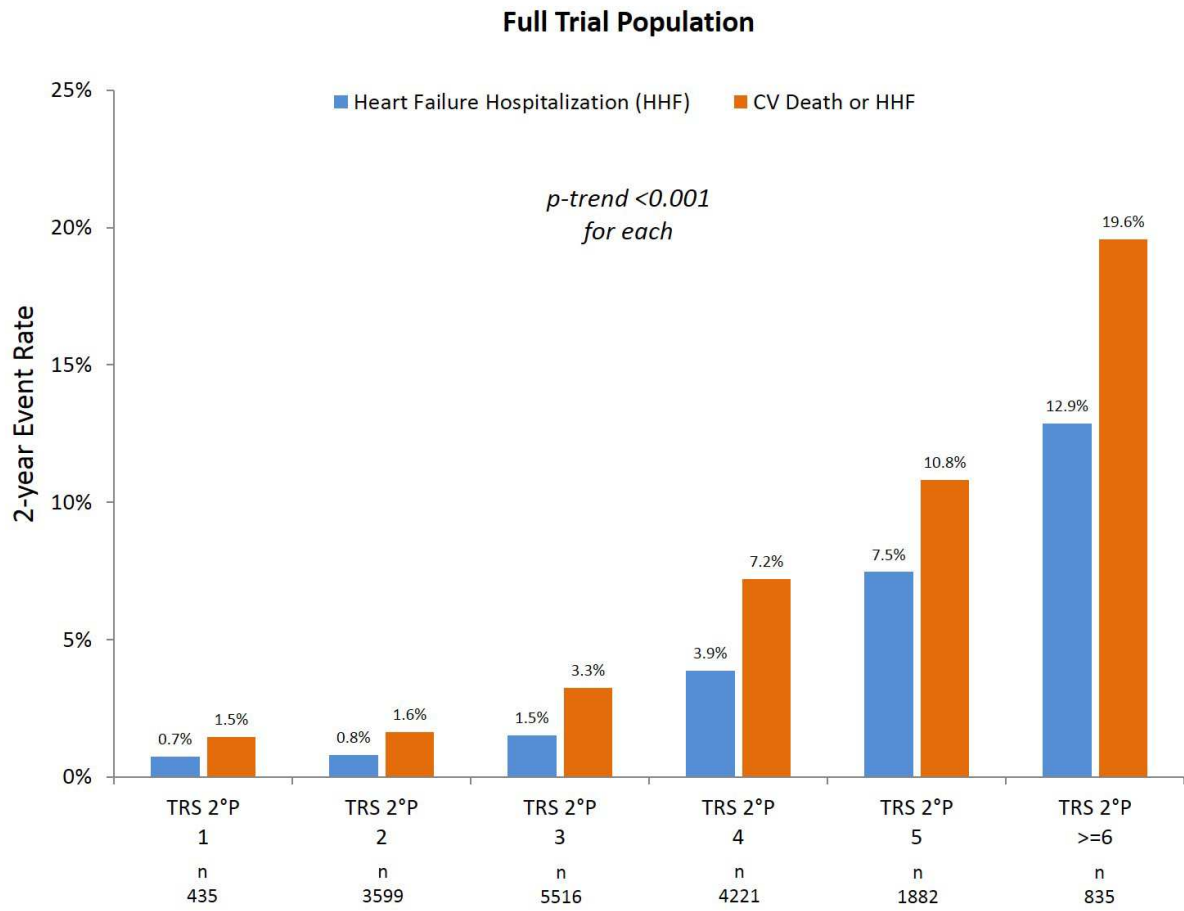

Supplement: DC171736SupplementaryData.pdf [file DC171736SupplementaryData.pdf]
